# Supplementary material for: Warming increases the top-down effects and metabolism of a subtidal herbivore
Source: PeerJ. 2013 Jul 25;1:e109. doi: 10.7717/peerj.109 (PMC3728763; doi:10.7717/peerj.109)
Supplement: File S1 [file peerj-01-109-s001.xlsx]

## Sheet: Sheet1
at 24*C
ΔC	V	W	T	WT	ΔCV	ΔCV/WT or Q
2.245	0.4	0.0202	2	0.0404	0.898	22.2277
3.234	0.39	0.0282	2	0.0564	1.26126	22.3628
1.999	0.43	0.0177	2	0.0354	0.85957	24.2816
2.781	0.36	0.0144	2	0.0288	1.00116	34.7625
1.946	0.42	0.0136	2	0.0272	0.81732	30.0485
2.647	0.38	0.0159	2	0.0318	1.00586	31.6308
3.193	0.39	0.0143	2	0.0286	1.24527	43.5409
3.141	0.39	0.0223	2	0.0446	1.22499	27.4661
2.647	0.41	0.0151	2	0.0302	1.08527	35.9361
2.709	0.38	0.0221	2	0.0442	1.02942	23.29
2.541	0.39	0.0205	2	0.041	0.99099	24.1705
at 14*C
ΔC	V	W	T	WT	ΔCV	ΔCV/WT or Q
1.19	0.4	0.0202	2	0.0404	0.476	11.7822
1.33	0.39	0.0282	2	0.0564	0.5187	9.19681
1.56	0.43	0.0177	2	0.0354	0.6708	18.9492
1.2	0.36	0.0144	2	0.0288	0.432	15
1.23	0.42	0.0136	2	0.0272	0.5166	18.9926
0.92	0.38	0.0159	2	0.0318	0.3496	10.9937
1.25	0.39	0.0143	2	0.0286	0.4875	17.0455
1.9	0.39	0.0223	2	0.0446	0.741	16.6143
1.51	0.41	0.0151	2	0.0302	0.6191	20.5
1.67	0.38	0.0221	2	0.0442	0.6346	14.3575
1.39	0.4	0.0161	2	0.0322	0.556	17.2671
