# Supplementary material for: Warming increases the top-down effects and metabolism of a subtidal herbivore
Source: PeerJ. 2013 Jul 25;1:e109. doi: 10.7717/peerj.109 (PMC3728763; doi:10.7717/peerj.109)
Supplement: File S5 [file peerj-01-109-s005.xlsx]

## Sheet: Sheet1
TANK #	TRIAL	TEMP	TREATMENT	PREULVA	POSTULVA
1	1	14	CONTROL	2.51	2.61
2	1	14	URCHIN	2.53	2.28
3	1	14	CONTROL	2.51	2.56
4	1	14	URCHIN	2.52	1.98
5	1	14	URCHIN	2.59	1.85
6	1	14	CONTROL	2.5	2.55
7	1	14	CONTROL	2.51	2.48
8	1	14	URCHIN	2.5	2.16
9	1	14	CONTROL	2.46	2.51
10	1	14	URCHIN	2.52	2.22
A	2	14	URCHIN	2.48	2.18
E	2	14	CONTROL	2.49	2.5
D	2	14	URCHIN	2.5	2.22
J	2	14	CONTROL	2.44	2.53
C	2	14	URCHIN	2.51	2.01
Q	2	14	CONTROL	2.52	2.54
O	2	14	URCHIN	2.5	2.15
L	2	14	CONTROL	2.45	2.5
F	2	14	CONTROL	2.44	2.5
I	2	14	URCHIN	2.48	2.07
A	1	28	URCHIN	2.5	1.85
E	1	28	CONTROL	2.5	2.57
D	1	28	URCHIN	2.51	1.05
J	1	28	CONTROL	2.49	2.33
C	1	28	URCHIN	2.52	1.54
Q	1	28	CONTROL	2.51	2.56
O	1	28	URCHIN	2.53	1.44
L	1	28	CONTROL	2.5	2.39
F	1	28	URCHIN	2.55	1.5
I	1	28	CONTROL	2.54	2.56
1	2	28	URCHIN	2.5	1.26
2	2	28	CONTROL	2.51	2.57
3	2	28	URCHIN	2.52	1.18
4	2	28	CONTROL	2.53	2.61
5	2	28	URCHIN	2.52	1.42
6	2	28	CONTROL	2.5	2.55
7	2	28	URCHIN	2.49	0.49
8	2	28	CONTROL	2.46	2.51
9	2	28	URCHIN	2.46	0.76
10	2	28	CONTROL	2.55	2.63
